# Supplementary material for: Construction and validation of an endoscopic ultrasonography-based ultrasomics nomogram for differentiating pancreatic neuroendocrine tumors from pancreatic cancer
Source: Frontiers journal article supplement (doi:10.3389/fonc.2024.1359364), 2024-05-23

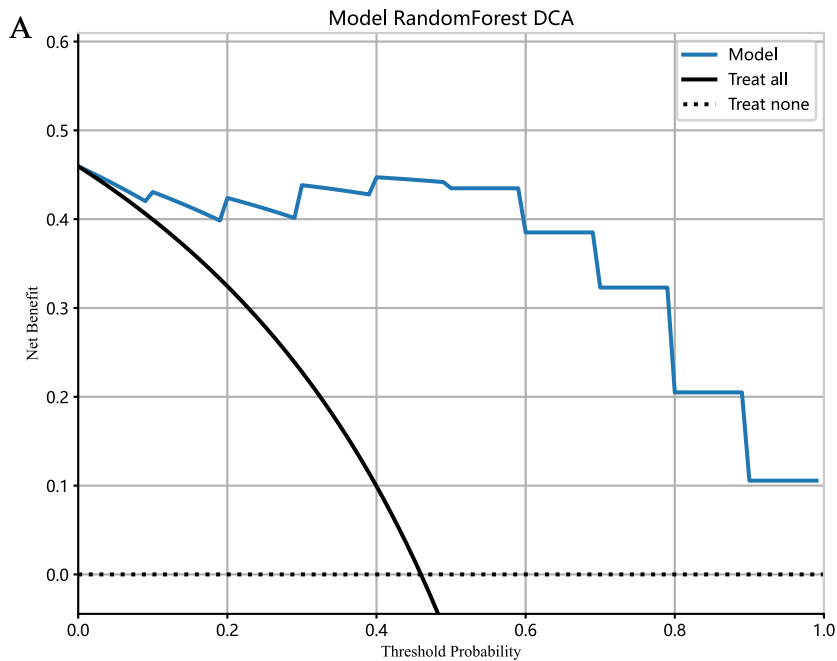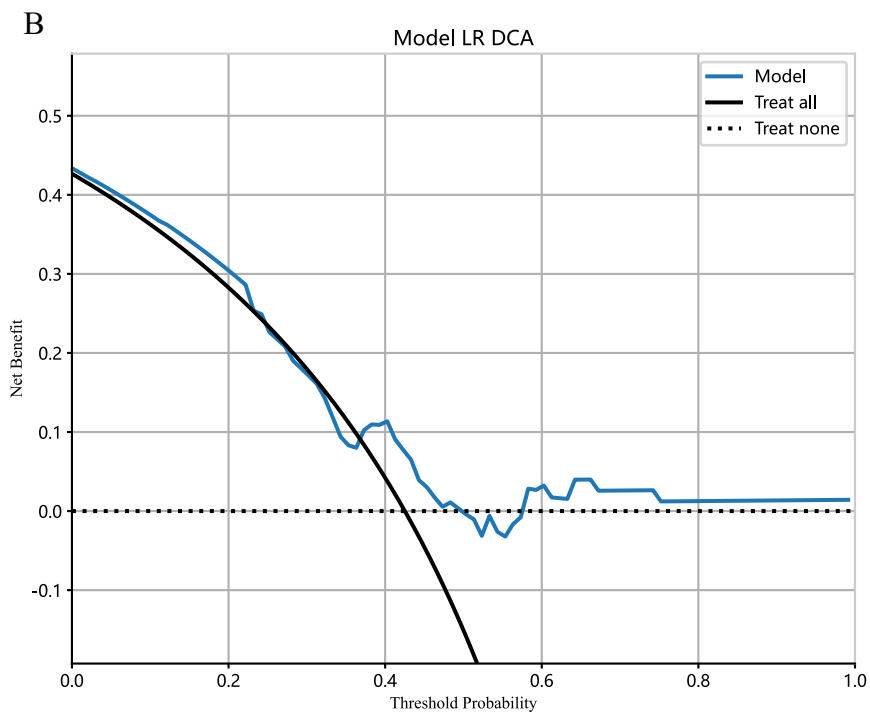

Supplement: Data_Sheet_3.PDF [file Data_Sheet_3.PDF]
